# Supplementary material for: Scaled in Cartesian Coordinates Ab Initio Molecular Force Fields of DNA Bases: Application to Canonical Pairs
Source: MDPI journal article supplement (doi:10.3390/molecules27020427), 2022-01-10
Supplement: s1 [file s1]

## Supplementary Materials

### Scaled in Cartesian coordinates *ab initio* molecular force fields of DNA bases: application to canonical pairs

Igor Kochikov, Anna Stepanova and Gulnara Kuramshina

**Table S1.** B3LYP/6-31G\* Cartesian scale factors (matrix *B*) for adenine.

|     |        |        |        |        |        |        |        |        |       |        |        |       |       |       |       |
|-----|--------|--------|--------|--------|--------|--------|--------|--------|-------|--------|--------|-------|-------|-------|-------|
| N1  | 0.992  |        |        |        |        |        |        |        |       |        |        |       |       |       |       |
| C2  | 0.003  | 1.015  |        |        |        |        |        |        |       |        |        |       |       |       |       |
| N3  | 0.000  | -0.011 | 0.970  |        |        |        |        |        |       |        |        |       |       |       |       |
| C4  | -0.011 | -0.002 | 0.006  | 0.991  |        |        |        |        |       |        |        |       |       |       |       |
| C5  | -0.007 | -0.009 | 0.002  | -0.002 | 1.007  |        |        |        |       |        |        |       |       |       |       |
| C6  | -0.002 | -0.006 | 0.009  | 0.002  | 0.002  | 0.946  |        |        |       |        |        |       |       |       |       |
| N7  | -0.002 | 0.001  | -0.005 | 0.005  | -0.002 | 0.008  | 0.952  |        |       |        |        |       |       |       |       |
| C8  | 0.007  | -0.001 | 0.000  | 0.005  | -0.002 | -0.007 | 0.000  | 1.007  |       |        |        |       |       |       |       |
| N9  | -0.010 | -0.001 | 0.005  | 0.000  | -0.006 | -0.008 | -0.002 | 0.002  | 0.985 |        |        |       |       |       |       |
| N10 | 0.008  | 0.002  | 0.007  | 0.007  | 0.003  | 0.012  | 0.010  | 0.015  | 0.003 | 0.909  |        |       |       |       |       |
| H11 | 0.005  | -0.001 | 0.008  | -0.005 | 0.006  | 0.000  | 0.010  | -0.013 | 0.003 | 0.008  | 0.985  |       |       |       |       |
| H12 | 0.007  | 0.000  | 0.005  | -0.004 | -0.002 | 0.008  | 0.013  | 0.003  | 0.002 | 0.012  | -0.025 | 0.954 |       |       |       |
| H13 | 0.004  | 0.000  | -0.008 | 0.010  | 0.001  | 0.016  | 0.011  | -0.004 | 0.009 | -0.002 | 0.003  | 0.005 | 0.947 |       |       |
| H14 | -0.001 | 0.006  | 0.006  | -0.003 | 0.000  | 0.013  | -0.001 | -0.001 | 0.006 | 0.006  | 0.013  | 0.014 | 0.002 | 0.930 |       |
| H15 | 0.003  | 0.001  | 0.004  | -0.001 | 0.008  | 0.005  | -0.001 | -0.012 | 0.009 | -0.002 | 0.001  | 0.007 | 0.002 | 0.009 | 0.966 |
| N1  | C2     | N3     | C4     | C5     | C6     | N7     | C8     | N9     | N10   | H11    | H12    | H13   | H14   | H15   |       |

**Table S2.** B3LYP/6-31G\* scale factors for thymine.

|     |        |        |        |        |        |        |        |        |        |        |       |       |        |        |       |
|-----|--------|--------|--------|--------|--------|--------|--------|--------|--------|--------|-------|-------|--------|--------|-------|
| O1  | 0.926  |        |        |        |        |        |        |        |        |        |       |       |        |        |       |
| O2  | 0.014  | 0.917  |        |        |        |        |        |        |        |        |       |       |        |        |       |
| N3  | -0.005 | -0.003 | 1.122  |        |        |        |        |        |        |        |       |       |        |        |       |
| N4  | -0.003 | -0.005 | -0.023 | 1.009  |        |        |        |        |        |        |       |       |        |        |       |
| C5  | -0.002 | 0.000  | -0.017 | -0.017 | 0.963  |        |        |        |        |        |       |       |        |        |       |
| C6  | 0.033  | 0.008  | -0.009 | -0.003 | -0.012 | 0.994  |        |        |        |        |       |       |        |        |       |
| C7  | -0.003 | 0.007  | -0.013 | 0.006  | 0.020  | 0.002  | 1.019  |        |        |        |       |       |        |        |       |
| C8  | 0.004  | 0.001  | -0.015 | -0.007 | -0.004 | -0.014 | -0.002 | 0.975  |        |        |       |       |        |        |       |
| C9  | 0.002  | 0.029  | -0.006 | -0.010 | 0.009  | -0.009 | -0.004 | -0.002 | 1.005  |        |       |       |        |        |       |
| H10 | 0.014  | 0.016  | 0.003  | -0.013 | -0.009 | 0.015  | 0.009  | 0.009  | 0.003  | 0.964  |       |       |        |        |       |
| H11 | -0.010 | -0.011 | -0.001 | 0.036  | 0.013  | 0.013  | -0.017 | 0.016  | -0.001 | -0.022 | 0.942 |       |        |        |       |
| H12 | 0.016  | 0.005  | -0.006 | 0.028  | 0.033  | -0.029 | -0.033 | 0.005  | -0.022 | 0.011  | 0.028 | 0.955 |        |        |       |
| H13 | 0.004  | 0.006  | -0.009 | 0.001  | 0.010  | 0.001  | 0.001  | 0.010  | 0.001  | 0.000  | 0.004 | 0.004 | 0.975  |        |       |
| H14 | 0.004  | 0.006  | -0.009 | 0.002  | 0.010  | 0.001  | 0.001  | 0.010  | 0.001  | 0.000  | 0.004 | 0.004 | -0.007 | 0.975  |       |
| H15 | 0.005  | 0.008  | -0.010 | -0.002 | 0.002  | 0.007  | 0.007  | 0.011  | 0.001  | -0.001 | 0.005 | 0.000 | -0.002 | -0.002 | 0.970 |
| O1  | O2     | N3     | N4     | C5     | C6     | C7     | C8     | C9     | H10    | H11    | H12   | H13   | H14    | H15    |       |

**Table S3.** B3LYP/6-31G\* scale factors for guanine.

|     |        |        |        |        |        |        |        |        |        |        |       |        |        |        |        |       |  |
|-----|--------|--------|--------|--------|--------|--------|--------|--------|--------|--------|-------|--------|--------|--------|--------|-------|--|
| N1  | 1.020  |        |        |        |        |        |        |        |        |        |       |        |        |        |        |       |  |
| C2  | -0.006 | 0.841  |        |        |        |        |        |        |        |        |       |        |        |        |        |       |  |
| N3  | -0.009 | 0.002  | 1.018  |        |        |        |        |        |        |        |       |        |        |        |        |       |  |
| C4  | -0.005 | 0.009  | 0.014  | 0.953  |        |        |        |        |        |        |       |        |        |        |        |       |  |
| C5  | 0.006  | 0.015  | 0.017  | -0.010 | 0.999  |        |        |        |        |        |       |        |        |        |        |       |  |
| C6  | 0.001  | 0.044  | -0.006 | 0.004  | 0.003  | 0.938  |        |        |        |        |       |        |        |        |        |       |  |
| N7  | 0.001  | 0.021  | -0.018 | -0.007 | 0.003  | -0.018 | 1.039  |        |        |        |       |        |        |        |        |       |  |
| N8  | 0.003  | 0.028  | -0.005 | -0.011 | -0.010 | -0.035 | -0.008 | 0.976  |        |        |       |        |        |        |        |       |  |
| C9  | 0.001  | 0.031  | -0.009 | -0.003 | 0.003  | 0.009  | -0.016 | -0.016 | 0.989  |        |       |        |        |        |        |       |  |
| H10 | 0.014  | -0.011 | 0.025  | 0.003  | -0.003 | 0.003  | -0.007 | 0.008  | -0.017 | 0.924  |       |        |        |        |        |       |  |
| N11 | -0.020 | -0.023 | -0.022 | -0.013 | 0.006  | 0.020  | 0.004  | 0.043  | 0.027  | 0.004  | 0.934 |        |        |        |        |       |  |
| H12 | -0.013 | -0.010 | -0.002 | -0.001 | 0.002  | 0.003  | 0.009  | 0.013  | 0.022  | 0.011  | 0.008 | 0.973  |        |        |        |       |  |
| H13 | 0.005  | 0.006  | -0.009 | 0.023  | -0.009 | 0.010  | 0.000  | 0.011  | 0.012  | -0.008 | 0.008 | -0.022 | 0.970  |        |        |       |  |
| O14 | 0.002  | 0.016  | 0.002  | 0.042  | 0.007  | 0.010  | -0.008 | -0.004 | -0.001 | 0.002  | 0.007 | -0.003 | -0.003 | 0.938  |        |       |  |
| H15 | -0.021 | 0.020  | 0.007  | -0.011 | -0.006 | 0.027  | -0.012 | -0.035 | -0.008 | 0.051  | 0.010 | -0.001 | 0.001  | -0.003 | 0.981  |       |  |
| H16 | 0.019  | 0.014  | -0.008 | 0.008  | -0.025 | -0.015 | 0.015  | 0.039  | -0.024 | -0.001 | 0.005 | 0.009  | 0.002  | -0.005 | -0.001 | 0.967 |  |
|     | N1     | C2     | N3     | C4     | C5     | C6     | N7     | N8     | C9     | H10    | N11   | H12    | H13    | O14    | H15    | H16   |  |

**Table S4.** B3LYP/6-31G\* scale factors for thymine.

|     |        |        |        |        |        |        |        |        |        |        |        |        |       |  |  |  |  |
|-----|--------|--------|--------|--------|--------|--------|--------|--------|--------|--------|--------|--------|-------|--|--|--|--|
| N1  | 0.917  |        |        |        |        |        |        |        |        |        |        |        |       |  |  |  |  |
| C2  | 0.013  | 0.937  |        |        |        |        |        |        |        |        |        |        |       |  |  |  |  |
| N3  | -0.028 | -0.006 | 1.046  |        |        |        |        |        |        |        |        |        |       |  |  |  |  |
| C4  | 0.005  | -0.014 | 0.000  | 0.994  |        |        |        |        |        |        |        |        |       |  |  |  |  |
| C5  | -0.004 | 0.013  | 0.000  | 0.024  | 0.968  |        |        |        |        |        |        |        |       |  |  |  |  |
| C6  | 0.025  | 0.021  | 0.027  | -0.005 | 0.025  | 0.888  |        |        |        |        |        |        |       |  |  |  |  |
| H7  | -0.003 | -0.004 | 0.010  | -0.007 | 0.007  | -0.020 | 0.988  |        |        |        |        |        |       |  |  |  |  |
| O8  | 0.011  | 0.045  | -0.012 | -0.007 | 0.001  | 0.017  | 0.001  | 0.925  |        |        |        |        |       |  |  |  |  |
| N9  | 0.005  | 0.008  | -0.004 | -0.004 | -0.008 | 0.014  | 0.017  | 0.007  | 0.957  |        |        |        |       |  |  |  |  |
| H10 | 0.020  | -0.009 | 0.029  | -0.008 | -0.005 | 0.016  | 0.000  | 0.016  | 0.019  | 0.920  |        |        |       |  |  |  |  |
| H11 | 0.017  | 0.008  | -0.020 | 0.009  | 0.000  | -0.001 | 0.010  | 0.013  | 0.013  | -0.005 | 0.954  |        |       |  |  |  |  |
| H12 | -0.003 | -0.004 | -0.021 | -0.023 | -0.001 | -0.013 | -0.003 | -0.013 | -0.011 | 0.004  | -0.010 | 1.104  |       |  |  |  |  |
| H13 | 0.022  | -0.010 | -0.025 | 0.033  | -0.022 | 0.004  | 0.000  | -0.008 | -0.015 | 0.000  | 0.008  | -0.008 | 1.019 |  |  |  |  |
|     | N1     | C2     | N3     | C4     | C5     | C6     | H7     | O8     | N9     | H10    | H11    | H12    | H13   |  |  |  |  |

**Table S5.** Quantum chemical (B3LYP/6-31G\*), observed and scaled frequencies of adenine

| No | Tentative assignment        | Hirakawa et al. [1] |         | Novak et al. [2] | B3LYP/6-31G* |        |
|----|-----------------------------|---------------------|---------|------------------|--------------|--------|
|    |                             | IR                  | Raman   | IR (Ar matrix)   | Calc.        | Scaled |
| 1  | NH <sub>2</sub> as str      |                     |         | 3565             | 3720         | 3565   |
| 2  | N9-H str                    |                     |         | 3498             | 3651         | 3499   |
| 3  | NH <sub>2</sub> sym str     |                     |         | 3441             | 3598         | 3448   |
| 4  | C8-H str                    |                     |         | 3057             | 3266         | 3059   |
| 5  | C2-H str                    |                     |         | 3041             | 3190         | 3041   |
| 6  | R6 str , NH <sub>2</sub> sc | 1673 vs             | 1677vw  | 1633             | 1681         | 1635   |
| 7  | R6 str                      | 1637w               | 1612    | 1612             | 1652         | 1614   |
| 8  | NH <sub>2</sub> sc , R6 str | 1604vs              | 1508    | 1590             | 1628         | 1598   |
| 9  | R6 str,C2Hin-pl-bend        | 1508                | 1482    | 1482             | 1534         | 1484   |
| 10 | R5 str                      | 1451                | 1462-42 | 1474             | 1522         | 1475   |
| 11 | R5 str                      | 1421                | 1419    | 1419             | 1447         | 1419   |
| 12 | C2H in-plane-bend           | 1368                | 1371    | 1389             | 1432         | 1390   |
| 13 | R6 str                      | 1335                | 1332    | 1345             | 1380         | 1335   |
| 14 | C6N str                     | 1309                | 1307    | 1328             | 1371         | 1328   |
| 15 | R5 str                      | 1253                | 1249    | 1290             | 1344         | 1292   |
| 16 | C8H in-plane-bend           | 1234                | 1235    | 1240             | 1277         | 1238   |
| 17 | NH <sub>2</sub> wag         | 1157                | 1163    | 1229             | 1258         | 1227   |
| 18 | R5-in-plane-def             | 1126                | 1126    |                  | 1152         | 1127   |
| 19 | N9-H in-plane-bend          | 1025                | 1024    | 1127             | 1091         | 1060   |
| 20 | NH <sub>2</sub> tw          | 951                 |         | 1032             | 1029         | 1003   |
| 21 | C2H-out-of-plane-end        | 940                 | 952     | 1005             | 972          | 950    |
| 22 | R5- in-plane-def            | 913                 | 941     | 927              | 944          | 927    |
| 23 | R6- in-plane-def            | 872                 | 899     | 927              | 901          | 886    |
| 24 | C8H-out-of-planebend        | 849                 |         | 887              | 844          | 823    |
| 25 | R6,R5 def (breath)          | 844                 | 846     | 802              | 809          | 802    |
| 26 | R5-o-o-pl-defingpuck)       | 797                 |         | 717              | 728          | 700    |
| 27 | C6N out-of-planebend        | 723                 | 797     | 610              | 686          | 655    |
| 28 | R5-in-plane-def (sqz)       | 684                 | 724     | 591              | 670          | 647    |
| 29 | R6-out-of-pl-def (tor)      | 660                 |         | 583              | 620          | 603    |
| 30 | R6-in-plane def             | 641                 | 622     | 566              | 578          | 568    |
| 31 | R6-in-plane-def             | 622                 | 560     | 513              | 535          | 528    |
| 32 | R5-out-of-pl-def (tor)      | 543                 | 535     |                  | 530          | 513    |
| 33 | NH <sub>2</sub> rock        | 530                 | 530     |                  | 516          | 503    |
| 34 | C6-N torsion                | 380                 | 331     | 503              | 507          | 495    |
| 35 | N9H out-of-pl bend          | 337                 |         |                  | 313          | 288    |
| 36 | R6-R5-out-of-pl-dftor       | 249                 |         |                  | 299          | 280    |
| 37 | R6-R5- out-of-pl-def        |                     | 242     | 276              | 272          | 254    |
| 38 | R6,R5out-ofpl-def btfl      |                     | 238     | 242              | 214          | 213    |

| 39                                                                                                                                                  | R6,R5-out-of-pl-def tw | 214                |       |      | 166               | 159           |              |        |
|-----------------------------------------------------------------------------------------------------------------------------------------------------|------------------------|--------------------|-------|------|-------------------|---------------|--------------|--------|
| <b>Table S6.</b> Comparison of observed frequencies, theoretical B3LYP/6-31G* and scaled force field frequencies (in cm <sup>-1</sup> ) of guanine. |                        |                    |       |      |                   |               |              |        |
| No                                                                                                                                                  | Tentative assignment   | R.Lopes et al. [3] |       |      | B.Giese et al.[4] | PBEPBE/DGDZVP | B3LYP/6-31G* |        |
|                                                                                                                                                     |                        | INS                | Raman | IR   | Raman (polycr)    | Theor.        | Theor.       | Scaled |
| 1                                                                                                                                                   | N-H str                | 1417               | 3348  | 3325 |                   | 3577          | 3668         | 3507   |
| 2                                                                                                                                                   | N-H str                |                    | 3164  | 3178 |                   | 3541          | 3646         | 3506   |
| 3                                                                                                                                                   |                        |                    | 3110  | 3113 |                   | 3486          | 3586         | 3490   |
| 4                                                                                                                                                   |                        |                    |       | 3064 |                   | 3463          | 3561         | 3456   |
| 5                                                                                                                                                   |                        | 1406               | 2992  | 2989 |                   | 3194          | 3269         | 3057   |
|                                                                                                                                                     |                        | 1375               | 2898  | 2904 |                   |               |              |        |
|                                                                                                                                                     |                        |                    |       | 2846 |                   |               |              |        |
|                                                                                                                                                     | CH str                 | 1269               | 2708  | 2696 |                   |               |              |        |
| 6                                                                                                                                                   |                        | 1226               |       | 1697 |                   | 1755          | 1833         | 1679   |
| 7                                                                                                                                                   |                        | 1190               | 1674  | 1672 | 1675              | 1631          | 1689         | 1606   |
| 8                                                                                                                                                   |                        | 1178               |       |      | 1602              | 1580          | 1633         | 1555   |
| 9                                                                                                                                                   | C=O str                | 1160               | 1549  | 1562 | 1575              | 1566          | 1619         | 1552   |
| 10                                                                                                                                                  | C=O str                | 1109               | 1549  | 1552 | 1545              | 1516          | 1570         | 1481   |
| 11                                                                                                                                                  | C=C str                | 1045               |       |      | 1503              | 1475          | 1526         | 1470   |
|                                                                                                                                                     |                        | 946                | 1479  | 1475 | 1479              |               |              |        |
|                                                                                                                                                     |                        | 909                | 1466  | 1465 | 1468              |               |              |        |
| 12                                                                                                                                                  |                        | 886                | 1421  | 1417 | 1421              | 1408          | 1449         | 1422   |
| 13                                                                                                                                                  |                        | 847                | 1390  | 1373 | 1390              | 1350          | 1398         | 1389   |
| 14                                                                                                                                                  |                        | 802                | 1359  |      | 1361              | 1341          | 1369         | 1361   |
| 15                                                                                                                                                  |                        | 786                | 1265  | 1261 | 1265              | 1293          | 1344         | 1267   |
| 16                                                                                                                                                  |                        | 737                | 1232  | 1215 | 1234              | 1265          | 1315         | 1234   |
| 17                                                                                                                                                  |                        | 705                | 1185  | 1173 | 1186              | 1138          | 1179         | 1188   |
| 18                                                                                                                                                  |                        | 694                | 1158  |      | 1155              | 1120          | 1153         | 1158   |
| 19                                                                                                                                                  |                        | 657                | 1121  | 1120 |                   | 1047          | 1082         | 1050   |
| 20                                                                                                                                                  |                        | 601                | 1046  | 1043 | 1048?             | 1044          | 1079         | 1049   |
| 21                                                                                                                                                  |                        | 570                |       |      |                   | 1016          | 1052         | 1047   |
| 22                                                                                                                                                  |                        | 562                | 935   | 949  | 937               | 910           | 947          | 936    |
|                                                                                                                                                     |                        | 557                |       |      |                   |               |              |        |
| 23                                                                                                                                                  |                        | 551                | 878   | 881  | 879               | 809           | 836          | 877    |
| 24                                                                                                                                                  |                        | 546                | 848   | 850  | 848               | 769           | 813          | 840    |
| 25                                                                                                                                                  |                        | 540                | 803   | 791  | 775               | 740           | 773          | 766    |
|                                                                                                                                                     |                        | 507                | 775   | 779  |                   |               |              |        |
| 26                                                                                                                                                  |                        | 499                | 727   | 727  | 710               | 715           | 736          | 704    |
| 27                                                                                                                                                  |                        | 403                | 711   | 702  |                   | 675           | 703          | 685    |
| 28                                                                                                                                                  |                        | 379                | 692   | 688  | 693               | 646           | 670          | 682    |
| 29                                                                                                                                                  |                        | 361                | 650   | 644  | 649               | 638           | 664          | 649    |
| 30                                                                                                                                                  |                        | 333                | 601   | 604  | 603               | 618           | 629          | 602    |
| 31                                                                                                                                                  |                        | 238                |       |      | 562               | 604           | 605          | 558    |
| 32                                                                                                                                                  |                        | 196                |       |      |                   | 569           | 598          | 540    |
| 33                                                                                                                                                  |                        | 177                | 540   |      |                   | 506           | 531          | 495    |
| 34                                                                                                                                                  |                        | 158                |       |      |                   | 500           | 526          | 486    |
| 35                                                                                                                                                  |                        | 138                |       |      | 495               | 471           | 486          | 410    |
| 36                                                                                                                                                  |                        | 127                |       |      | 397               | 346           | 363          | 355    |
| 37                                                                                                                                                  |                        | 124                |       |      | 340               | 324           | 341          | 334    |

|    |    |     |     |     |     |
|----|----|-----|-----|-----|-----|
| 38 | 90 | 357 | 320 | 333 | 328 |
| 39 | 60 |     | 306 | 317 | 299 |
| 40 | 30 |     | 193 | 203 | 198 |
| 41 |    |     | 150 | 162 | 156 |
| 42 |    |     | 132 | 140 | 142 |

**Table S7.** Comparison of theoretical B3LYP/6-31G\* and observed frequencies (in cm<sup>-1</sup>) of thymine.

| No | Tentative assignment | Szczepaniak et al. [5] | Singh et al. [6] |               | Rastogi et al. [7] |       |           | B3LYP /6-31G* | Scaled |
|----|----------------------|------------------------|------------------|---------------|--------------------|-------|-----------|---------------|--------|
|    |                      | IIR                    | IR in KBr        | Raman polycr. | IR gas             | Raman | Raman cr. |               |        |
| 1  | N-H str              | 3470 IR                | 3185 vs          | 3185sh        | 3484               |       |           | 3641          | 3474   |
| 2  | N-H str              | 3432 IR                | 3160 ch          | 3160sh        | 3437               | 3070  |           | 3603          | 3432   |
| 3  | CH str               | 3078 Ra                | 3060 m           | 3060w         | 3076+              | 3044  |           | 3219          | 3080   |
| 4  | CH3 str              | 2997 Ra                | 3005 w           | 3000w         | 2984               | 3021  |           | 3132          | 2999   |
| 5  | CH3str               | 2992 IR                |                  |               | 2941               |       |           | 3111          | 2992   |
| 6  | CH3 str              | 2969                   |                  |               |                    | 2968  |           | 3054          | 2968   |
|    |                      | 2939                   | 2925s            | 2925m         |                    | 2919  |           |               |        |
|    |                      |                        | 2895sh           | 2900w         |                    |       |           |               |        |
| 7  | C=O str              | 1767                   |                  |               | 1772               |       |           | 1845          | 1771   |
| 8  | C=O str              | 1711                   | 1738vs           | 1740vs        | 1725               | 1720  | 1718      | 1793          | 1715   |
| 9  | C=C str              | 1668                   | 1680vs           | 1680s         | 1668               | 1670  | 1674      | 1717          | 1671   |
|    |                      |                        | 1640sh           | 1645sh        | 1630m              |       | 1600      |               |        |
|    |                      |                        | 1505sh           | 1505w         | 1518               |       |           |               |        |
| 10 |                      |                        |                  |               |                    | 1488  | 1492      | 1524          | 1512   |
| 11 |                      | 1472                   | 1465sh           | 1465 s        | 1463               |       |           | 1506          | 1472   |
| 12 |                      | 1455                   | 1445vs           | 1445vs        |                    |       | 1437      | 1500          | 1453   |
| 13 |                      | 1431                   |                  | 1430s         |                    | 1432  |           | 1448          | 1431   |
| 14 |                      | 1405                   | 1420c            | 1420s         | 1409               | 1406  | 1413      | 1431          | 1405   |
|    |                      | 1388                   | 1380s            |               | 1393               |       |           |               |        |
| 15 |                      | 1367                   | 1360sh           | 1375vs        |                    | 1367  | 1379      | 1411          | 1383   |
| 16 |                      | 1357                   |                  | 1360sh        |                    |       | 1373      | 1385          | 1366   |
|    |                      |                        | 1300w            | 1300sh        |                    | 1259  |           |               |        |
| 17 |                      | 1220                   | 1240vs           | 1240vs        |                    | 1245  | 1263      | 1238          | 1221   |
| 18 |                      | 1183                   | 1195vs           | 1200vs        |                    | 1214  | 1252      | 1207          | 1183   |
| 19 |                      | 1139                   | 1145w            | 1150w         | 1178               |       | 1221      | 1162          | 1138   |
| 20 |                      | 1046                   | 1030s            | 1030vs        | 1031               | 1025  | 1161      | 1082          | 1045   |
| 21 |                      | 1004                   | 985s             | 995vs         | 963                | 983   | 1053      | 1031          | 1005   |
| 22 |                      | 959                    | 940s             | 940vs         | 931                |       | 986       | 969           | 959    |
| 23 |                      | 889                    |                  | 900w          | 895                |       | 938       | 910           | 883    |
| 24 |                      |                        | 850vs            | 845s          |                    |       |           | 806           | 802    |
| 25 |                      | 799                    | 815vs            | 815vs         | 804                |       |           | 767           | 790    |
| 26 |                      | 763                    | 760s             | 760vs         | 767                |       | 810       | 749           | 760    |
| 27 |                      | 754                    | 745s             | 740vs         | 755                |       | 747       | 738           | 746    |
| 28 |                      | 727                    | 710sh            |               | 689                |       | 624       | 690           | 705    |
| 29 |                      |                        |                  | 640w          | 658                |       | 563       | 605           | 597    |
| 30 |                      |                        | 610mw            | 610m          |                    |       | 474       | 562           | 546    |
| 31 |                      |                        | 560vs            |               | 541                |       | 434       | 545           | 500    |
| 32 |                      |                        | 462vs            |               | 462                |       |           | 460           | 457    |
| 33 |                      |                        | 420s             |               |                    |       |           | 397           | 371    |
| 34 |                      |                        |                  |               |                    |       | 325       | 387           | 364    |

|    |  |     |     |     |
|----|--|-----|-----|-----|
| 35 |  | 292 | 298 | 294 |
| 36 |  |     | 276 | 268 |
| 37 |  | 175 | 153 | 161 |
| 38 |  | 157 | 136 | 133 |
| 39 |  | 121 | 112 | 109 |

**Table S8.** Comparison of observed frequencies, theoretical B3LYP/6-31G\* and frequencies for the scaled force field (in cm<sup>-1</sup>) of cytosine

| No | Tentative assignment | Szczesniak [8] | Radchenko et al. [9] |              | Mathlouthi et al. [10] | Nowak et al. [11] |      | B3LYP 6-31G* | Scaled |
|----|----------------------|----------------|----------------------|--------------|------------------------|-------------------|------|--------------|--------|
|    |                      | IR             | IR solid             | Raman polycr | Ne                     | Ne                | Ar   |              |        |
| 1  | N-H str              | 3587           |                      |              | 3618-3609              | 3618              | 3592 | 3711         | 3592   |
| 2  | N-H str              | 3559           |                      |              | 3575                   | 3575              | 3564 | 3617         | 3563   |
| 3  | CH str               | 3468           |                      |              | 3527                   | 3461              | 3446 | 3589         | 3446   |
| 4  | CH3 str              | 3438           |                      |              | 3501                   |                   |      | 3239         | 3312   |
| 5  | CH3str               |                |                      |              | 3474                   |                   |      | 3216         | 3173   |
|    |                      |                |                      |              | 3461                   |                   |      |              |        |
|    |                      |                |                      |              | 3457                   |                   |      |              |        |
| 6  | CH3 str              | 1749           | 1705                 | 1708         |                        |                   |      | 1820         | 1627   |
| 7  |                      | 1729           |                      |              | 1770                   | 1625              | 1623 | 1708         | 1598   |
|    |                      | 1714           |                      |              | 1760                   |                   | 1589 |              |        |
| 8  | C=O str              | 1670           | 1657                 | 1666         | 1730-1725              | 1592              | 1600 | 1660         | 1570   |
| 9  | C=O str              | 1665           |                      |              | 1686                   | 1576              | 1575 | 1582         | 1499   |
| 10 | C=C str              | 1655           | 1616                 | 1620         | 1678                   | 1569              | 1570 | 1522         | 1436   |
|    |                      | 1620           |                      |              |                        | 1563              | 1561 |              |        |
|    |                      | 1617           |                      | 1582         | 1668                   |                   |      |              |        |
| 11 |                      | 1595           |                      |              | 1659                   | 1495              | 1496 | 1454         | 1381   |
|    |                      | 1587           | 1540                 | 1542         | 1642                   | 1482              | 1439 |              |        |
|    |                      | 1559           | 1505                 | 1502         | 1623                   | 1441              | 1427 |              |        |
| 12 |                      | 1535           | 1469                 | 1470         | 1602-1597              | 1430              | 1379 | 1367         | 1326   |
|    |                      | 1490           |                      |              | 1592                   | 1382              |      |              |        |
| 13 |                      | 1473           |                      |              | 1576-1569-1563         | 1380              |      | 1263         |        |
|    |                      |                |                      |              | 63                     |                   |      |              | 1275   |
|    |                      | 1438           | 1366                 | 1376         | 1554                   | 1338              | 1333 |              |        |
| 14 |                      | 1426           |                      |              | 1540                   | 1324              | 1320 | 1224         | 1196   |
|    |                      | 1376           |                      |              | 1495-1492              | 1258?             | 1257 |              |        |
|    |                      | 1336           | 1280                 | 1284         | 1475                   | 1198              | 1196 |              |        |
|    |                      | 1318           | 1240                 | 1260         | 1441                   | 1113              | 1110 |              |        |
| 15 |                      |                |                      |              | 1430                   | 1109              | 1108 | 1134         | 1111   |
|    |                      | 1256           |                      |              | 1436                   | 1085              | 1083 |              |        |
|    |                      | 1223           |                      |              | 1427                   | 989               | 980  |              |        |
| 16 |                      | 1209           | 1155                 | 1158         | 1423                   | 982               | 855? | 1105         | 1082   |
| 17 |                      | 1193           |                      | 1118         | 1397                   | 948?              | 807  | 991          | 980    |
| 18 |                      |                | 1100                 |              |                        | 848?              | 781  | 955          | 924    |
| 19 |                      | 1123           |                      |              |                        | 809               | 751? | 926          | 904    |
| 20 |                      | 1107           |                      |              |                        | 796               | 710  | 771          | 804    |
| 21 |                      | 1090           | 1012                 | 1022         |                        | 784?              | 601? | 770          | 776    |
| 22 |                      | 1082           |                      | 1002         |                        | 711               | 569  | 761          | 699    |
| 23 |                      |                |                      | 980          |                        | 600?              | 520  | 732          | 699    |
| 24 |                      |                | 955                  | 904          |                        | 525               | 557  | 630          | 581    |

|    |     |     |     |     |     |     |     |
|----|-----|-----|-----|-----|-----|-----|-----|
| 25 | 980 | 866 |     | 553 | 498 | 577 | 556 |
| 26 |     | 822 |     | 511 | 441 | 549 | 524 |
| 27 |     | 794 | 798 | 498 | 451 | 534 | 510 |
| 28 | 817 | 783 |     | 494 | 343 | 526 | 491 |
| 29 | 807 | 758 |     | 443 | 350 | 393 | 428 |
| 30 | 780 | 700 | 710 | 342 | 297 | 359 | 339 |
| 31 | 767 |     |     |     |     | 328 | 295 |
| 32 | 749 |     |     |     |     | 204 | 193 |
| 33 | 709 | 602 | 608 |     |     | 138 | 135 |
|    | 635 |     | 578 |     |     |     |     |
|    | 613 |     | 558 |     |     |     |     |
|    | 574 |     | 546 |     |     |     |     |
|    | 567 |     |     |     |     |     |     |
|    | 535 |     |     |     |     |     |     |
|    | 519 |     | 490 |     |     |     |     |
|    | 507 |     | 460 |     |     |     |     |
|    | 498 |     | 414 |     |     |     |     |
|    | 441 |     |     |     |     |     |     |

- 1 Hirakawa, A. Y.; Okada, H.Y.; Sasagawa, S.; Tsuboi, M. Infrared and Raman spectra of adenine and its  $^{15}\text{N}$  and  $^{13}\text{C}$  substitution products. *Spectrochimica Acta A* **1985**, *41*, 209-216. [https://doi.org/10.1016/0584-8539\(85\)80099-4](https://doi.org/10.1016/0584-8539(85)80099-4)
- 2 Nowak, M.J.; Lapinski, L.; Kwiatkowski, J.S.; Leszczynski, J. Molecular structure and infrared spectra of adenine. Experimental matrix isolation and density functional theory study of adenine  $^{15}\text{N}$  isotopomers. *J. Phys. Chem.* **1996**, *100*, 3527-3534. <https://doi.org/10.1021/jp9530008>
- 3 Lopes, R.P.; Marques, M.P.M.; Valero, R.; Batista de Carvalho, L.A.E. A combined study using vibrational spectroscopy and theoretical methods. *J. of Spectroscopy* **2012**, *27*, 273–292. <https://doi.org/10.1155/2012/168286>
- 4 Giese, B.; McNaughton, D. Density functional theoretical (DFT) and surface-enhanced Raman spectroscopic study of guanine and its alkylated derivatives. Part 1. DFT calculations on neutral, protonated and deprotonated guanine. *Phys. Chem. Chem. Phys.* **2002**, *4*, 5161–5170. <https://doi.org/10.1039/B203829C>
- 5 Szczepaniak, K.; Szczesniak, M.; Person, W.B. Raman and infrared spectra of thymine. A matrix isolation and DFT study. *J. Phys. Chem. A* **2000**, *104*, 3852-3863. <https://doi.org/10.1021/jp994410p>
- 6 Singh, J.S. FTIR and Raman spectra and fundamental frequencies of biomolecule: 5-Methyluracil (thymine). *J. Mol. Struct.* **2008**, *876*, 127–133. <https://doi.org/10.1016/j.molstruc.2007.06.014>
- 7 Rastogi, V.K. ; Singh, C.; Jain, V.; Alcolea Palafox, M. FTIR and FT-Raman spectra of 5-methyluracil (thymine). *J. Raman Spectrosc.* **2000**, *31*, 1005–1012. [0.1002/1097-4555\(200011\)31:11<1005::AID-JRS636>3.0.CO;2-7](https://doi.org/10.1002/1097-4555(200011)31:11<1005::AID-JRS636>3.0.CO;2-7)
- 8 Szczesniak, M.; Szczepaniak, K.; Kwiatkowski, J. S.; KuBulat, K.; Person, W. B. Matrix isolation infrared studies of nucleic acid constituents. 5. Experimental matrix-isolation and theoretical ab initio SCF Molecular orbital studies of the infrared spectra of cytosine monomers. *J. Am. Chem. Soc.* **1988**, *110*(25), 8319-8330. <https://doi.org/10.1021/ja00233a006>
- 9 Radchenko, E.D. ; Sheina, G.G.; Smorgio, N.A.; Blagoi, Yu.P. Experimental and theoretical studies of molecular structure features of cytosine. *J. Mol. Struct.*, **1984**, *116*, 387-396.
- 10 Mathlouthi, M.; Seuvre, A.; Koenig, J. F.t.-i.r. and laser-Raman spectra of cytosine and cytidine. *Carbohydr. Res.* **1986**, *146* (1), 1-13. [https://doi.org/10.1016/0008-6215\(86\)85019-4](https://doi.org/10.1016/0008-6215(86)85019-4)
- 11 Nowak, M. J.; Lapinsky, L.; Fulara, J. Matrix isolation studies of cytosine: The separation of the infrared spectra of cytosine tautomers. *Spectrochimica Acta A*, **1989**, *45*(2), 229. [https://doi.org/10.1016/0584-8539\(89\)80129-1](https://doi.org/10.1016/0584-8539(89)80129-1)
